# Supplementary material for: L-2hydroxyglutaric acid rewires amino acid metabolism in colorectal cancer via the mTOR-ATF4 axis
Source: PubMed Central journal article supplement (PMC10101855; doi:10.1038/s41388-023-02632-7), 2023-03-06
Supplement: 41388_2023_2632_MOESM1_ESM.pdf [file 41388_2023_2632_MOESM1_ESM.pdf]

## Supplementary Fig. S1

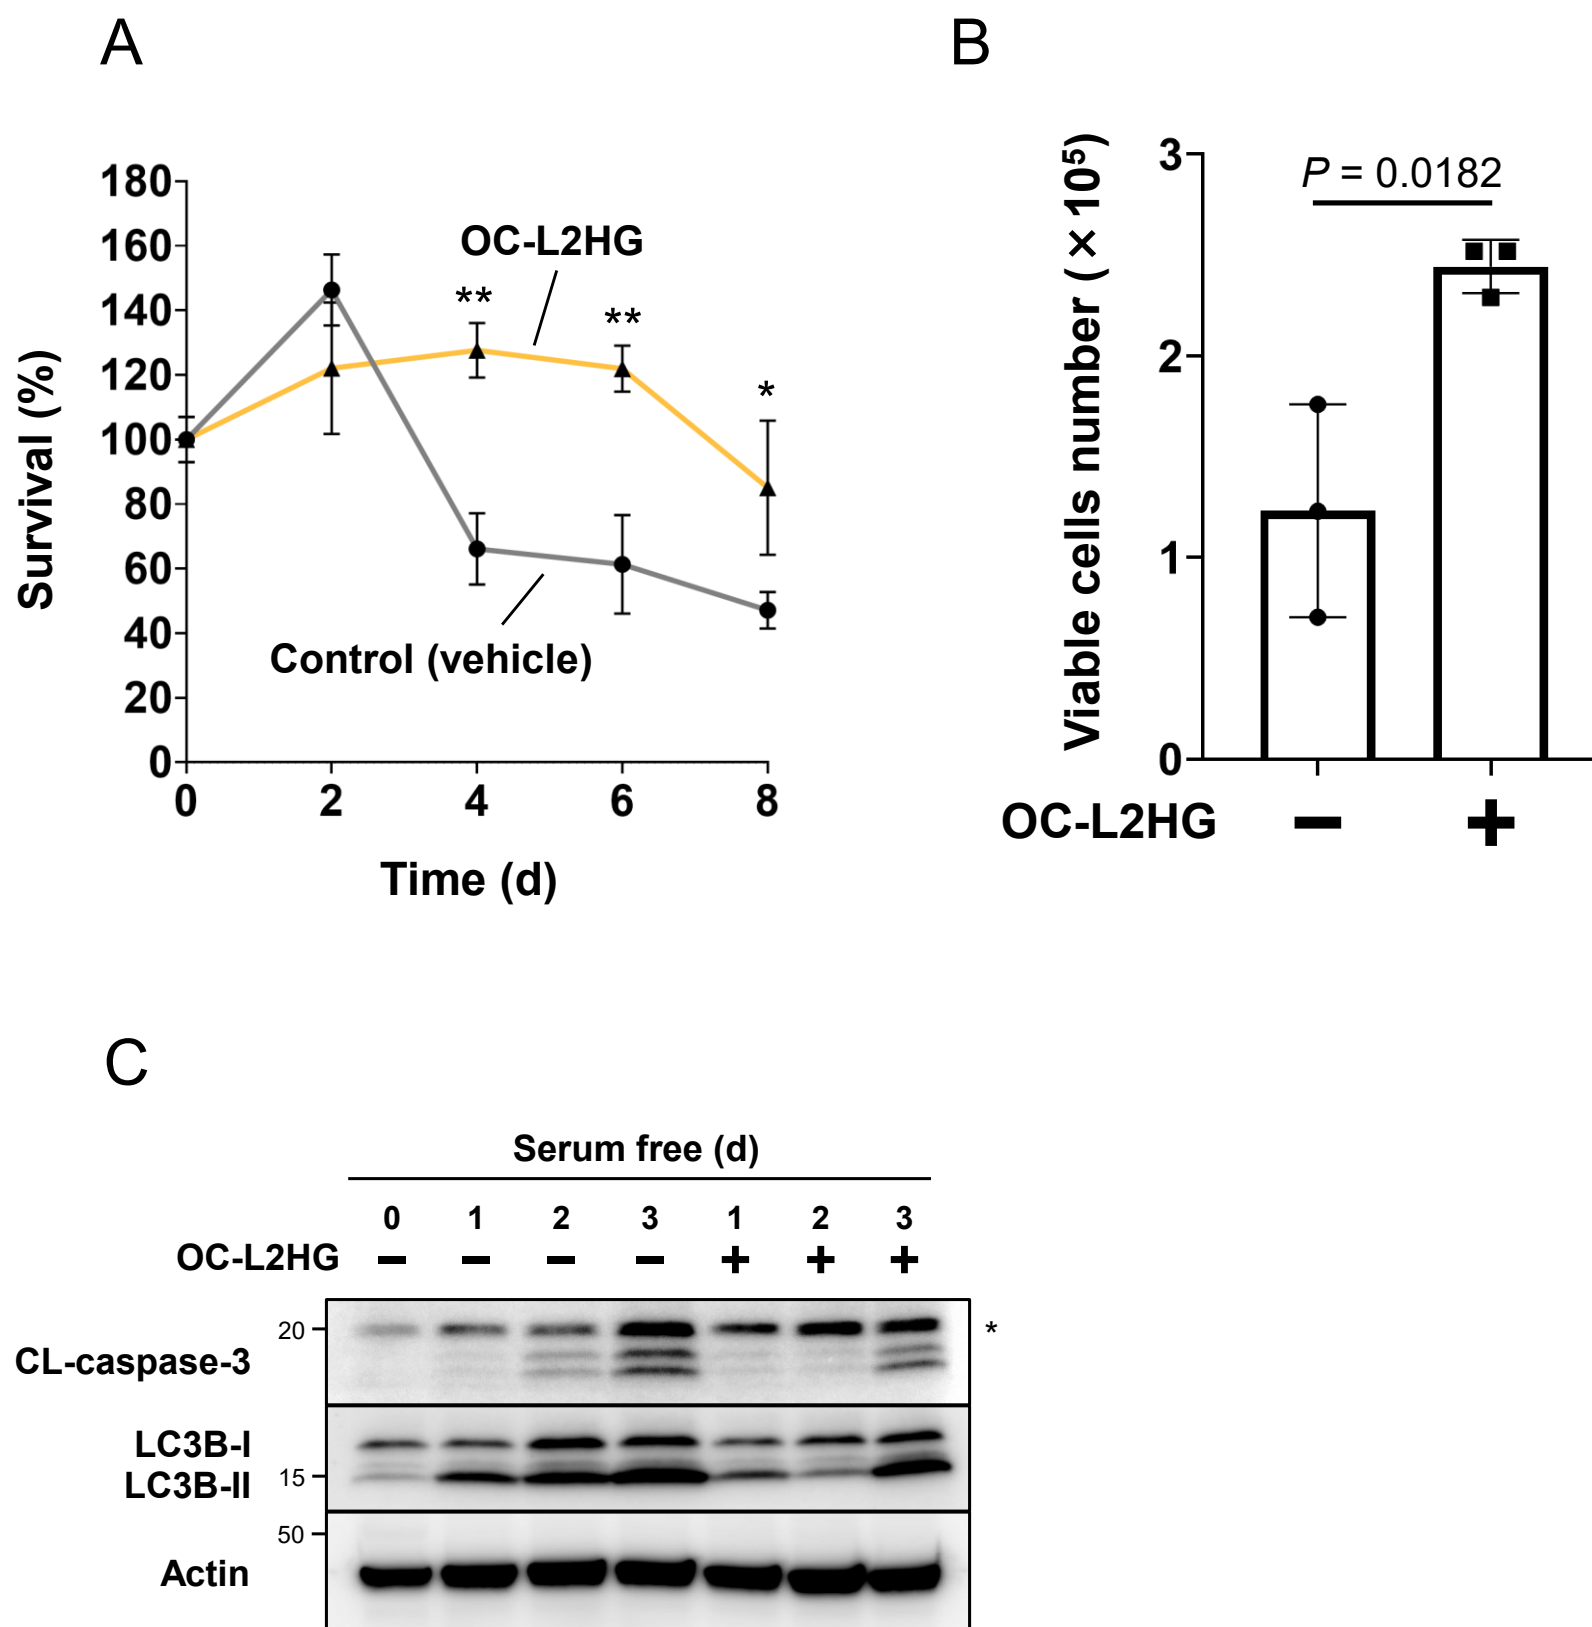

### Supplementary Fig. S1. L2HG levels are increased in colorectal tumors (related to Figure 1).

(A) Viability in HT29 cells treated with OC-L2HG (250  $\mu$ M) under serum-free conditions. Viability was assessed using MTT assays. Data are presented as the mean  $\pm$  SD of three independent experiments. \*  $P < 0.05$  and \*\*  $P < 0.01$ . (B) Viability in CaR1 cells treated with OC-L2HG (250  $\mu$ M) under serum-free conditions for 6 d. Viable cells were counted using a trypan blue exclusion assay. Data represent the mean  $\pm$  SD of three independent experiments. (C) Expression of CL-caspase 3 and LC3B in CaR1 cells treated with OC-L2HG under serum-free conditions. Asterisk, nonspecific band.

# Supplementary Fig. S2

## HT29 cells

A

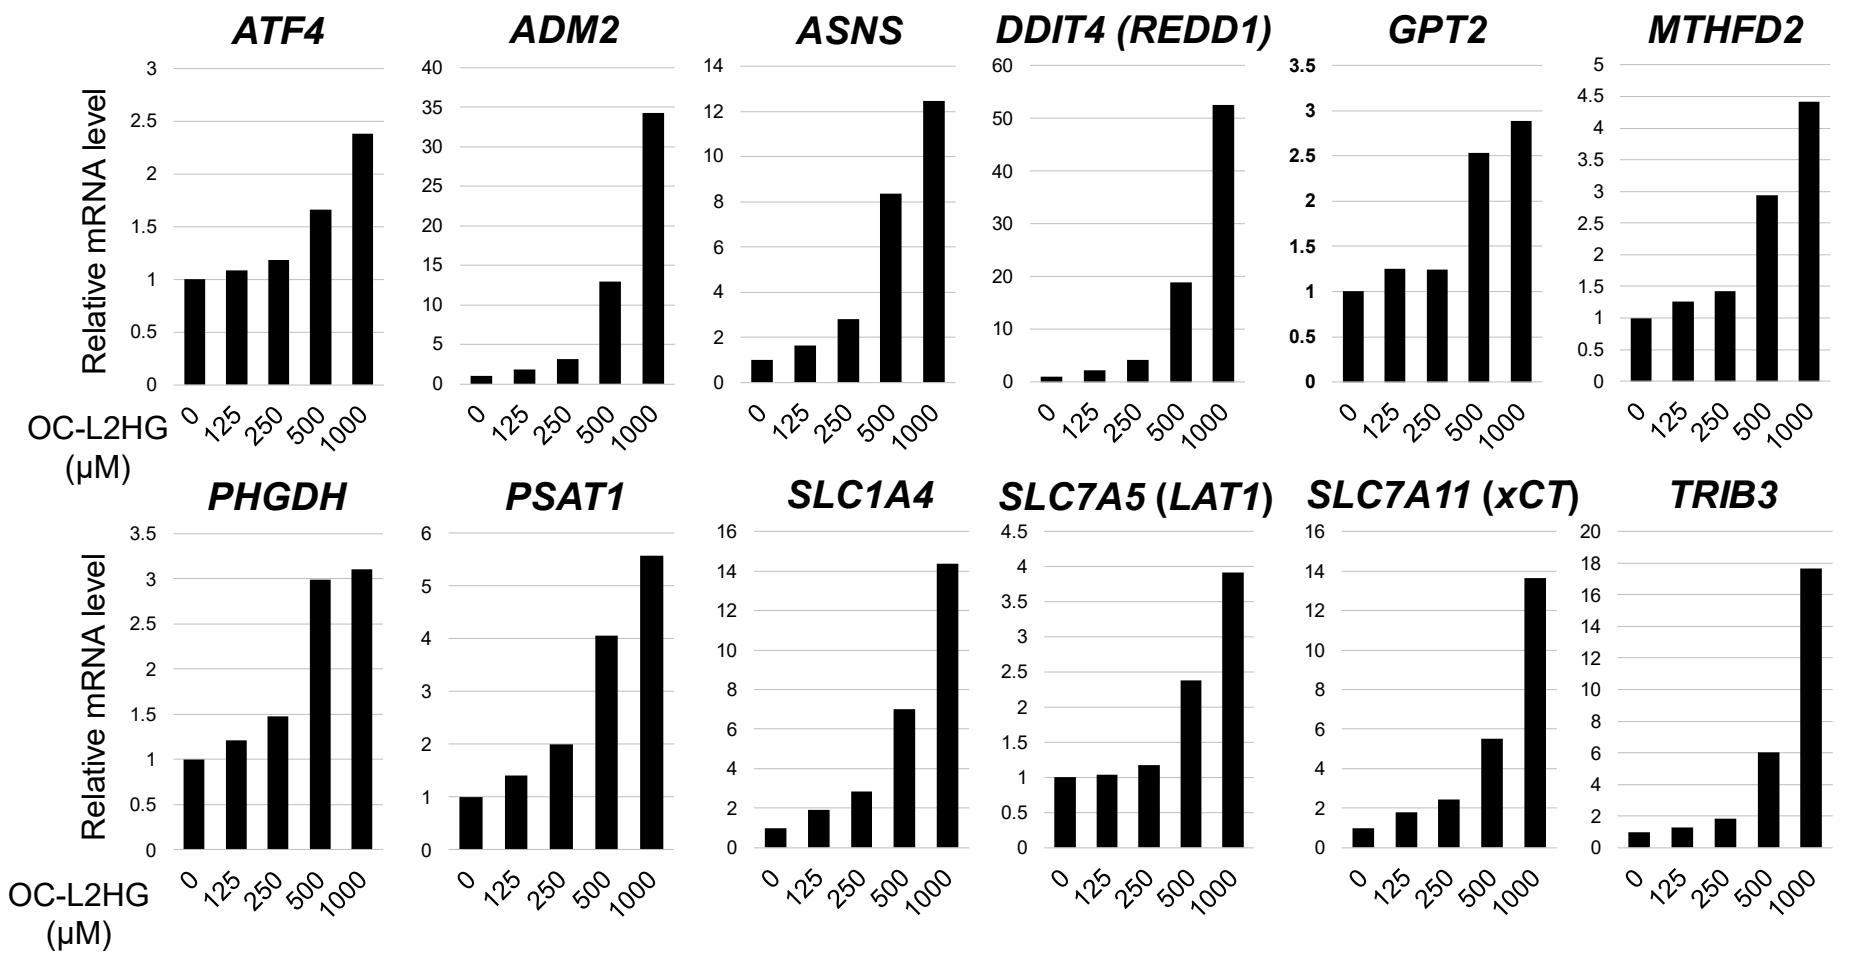

## HT29 cells

B

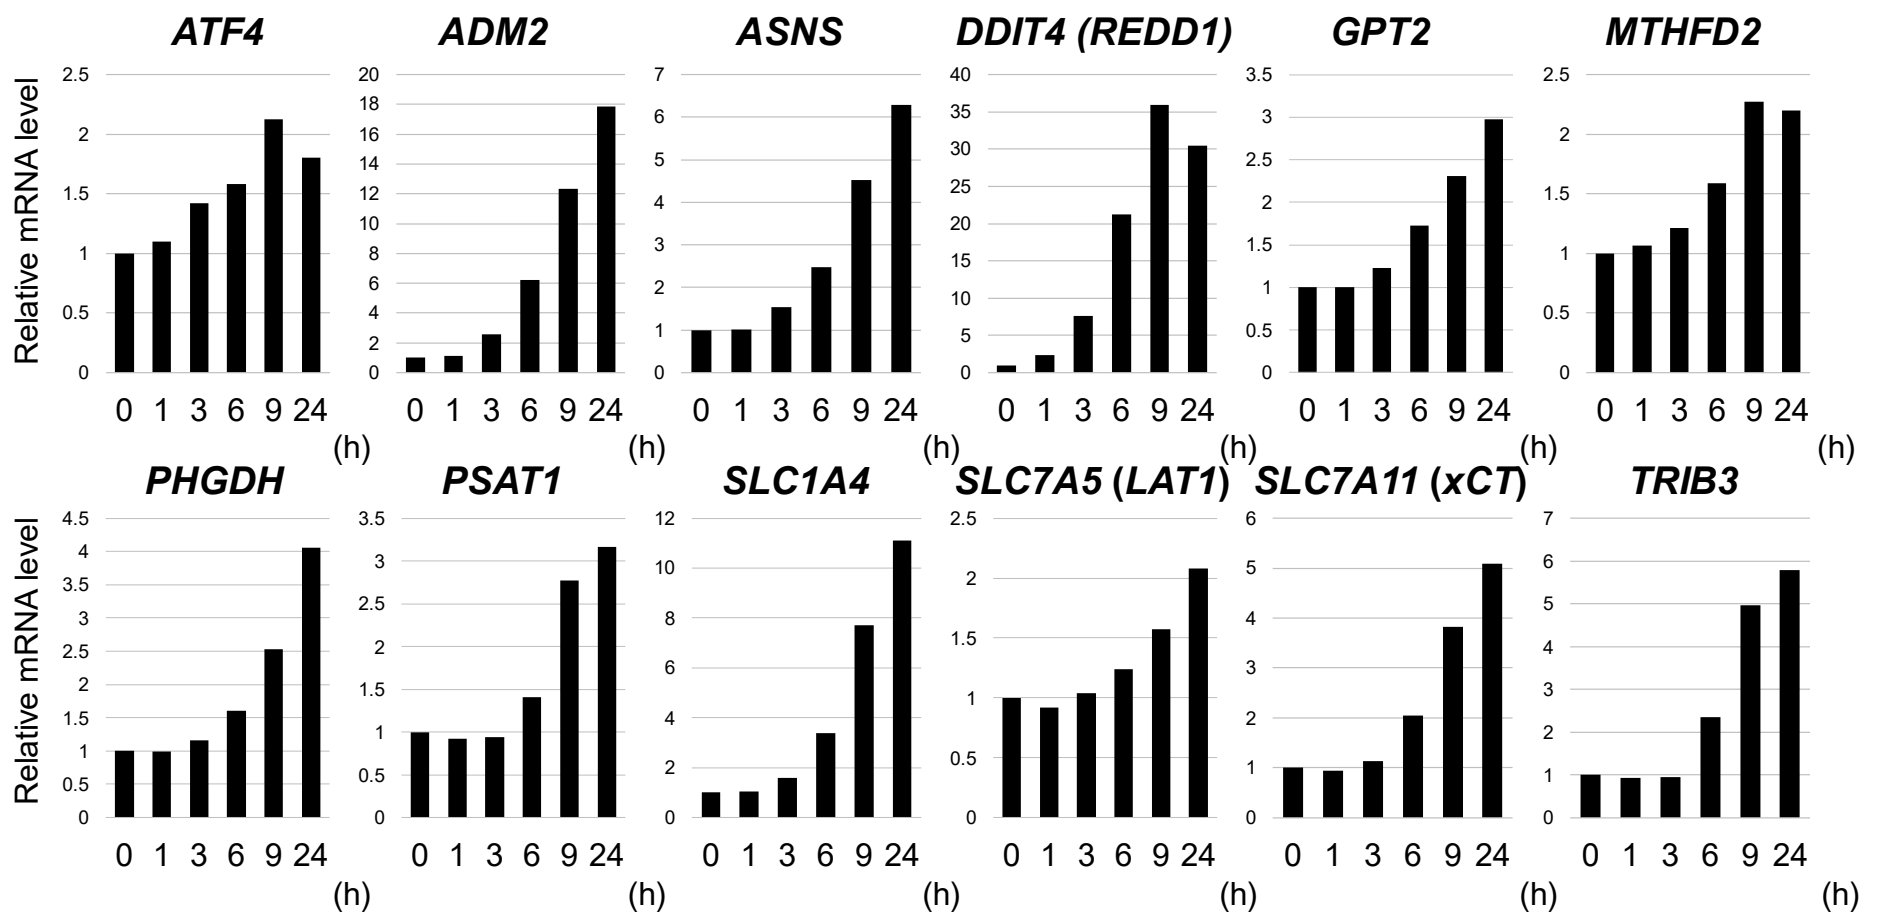

## HTCT116 cells

C

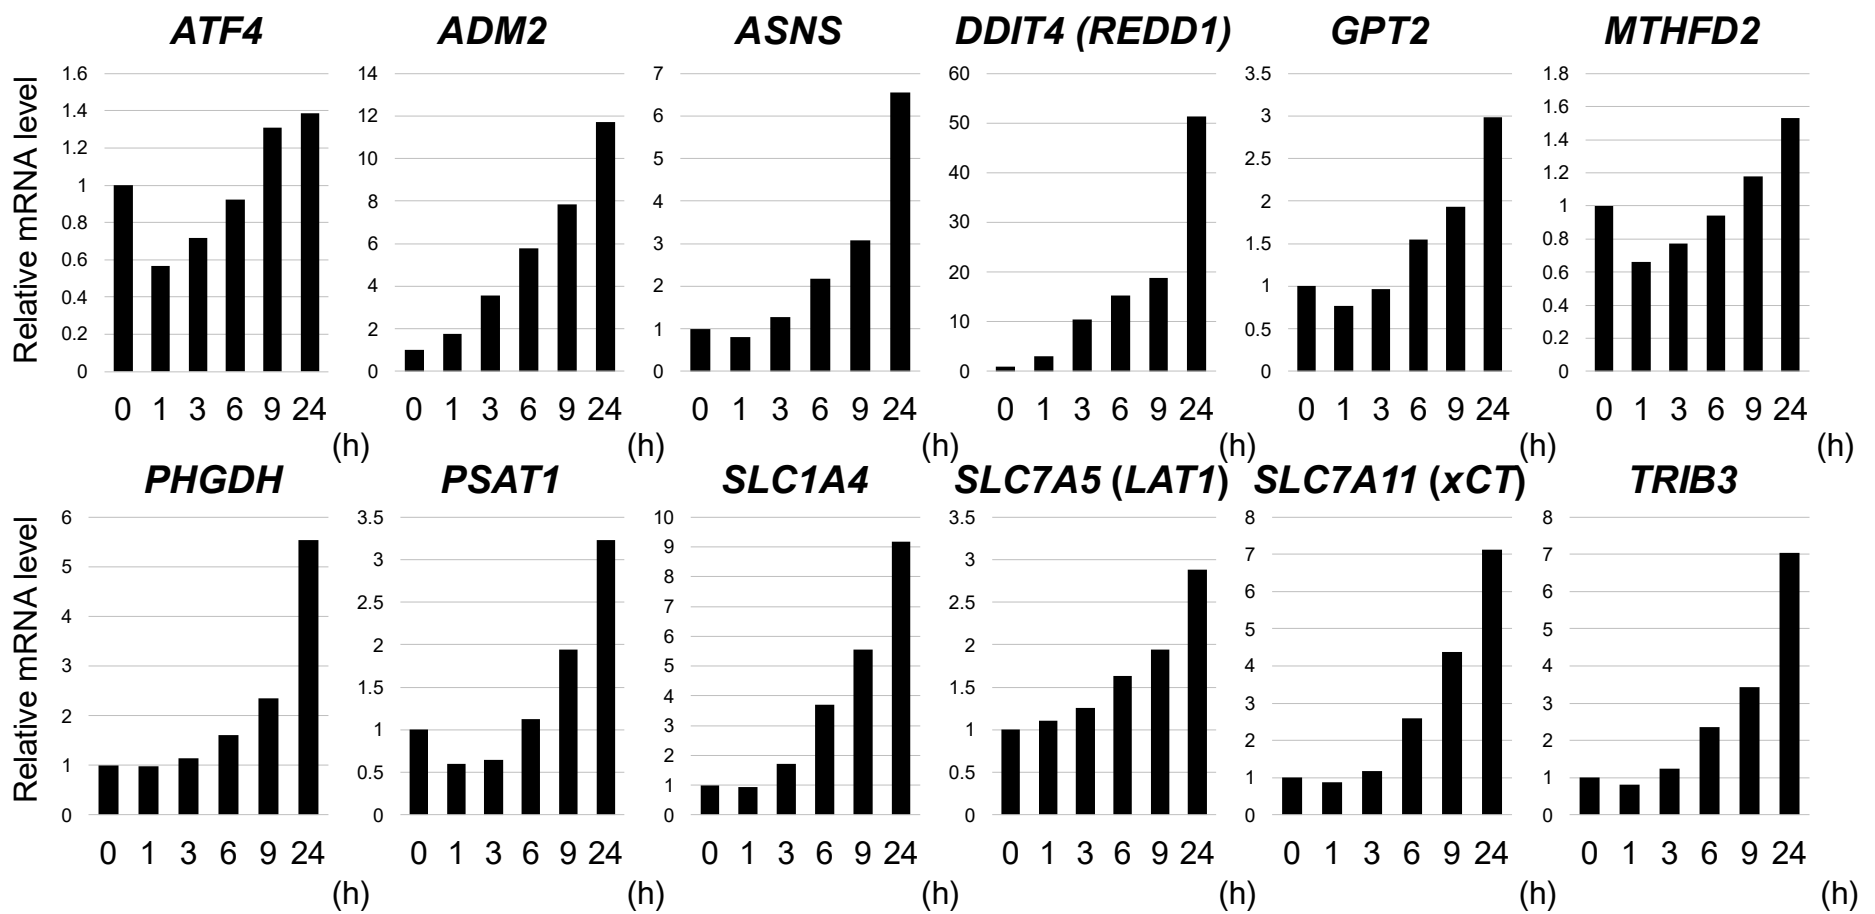

D

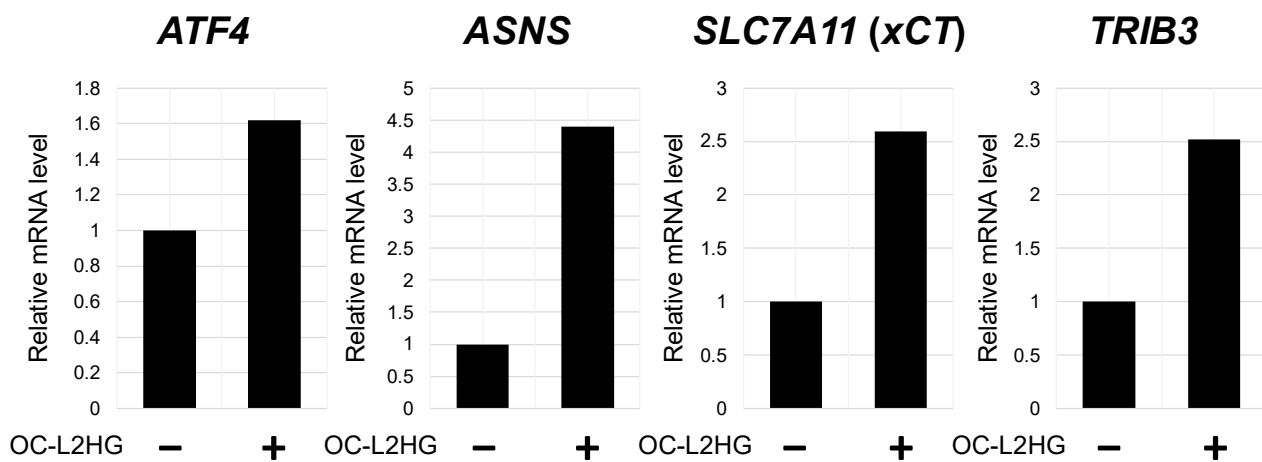

E

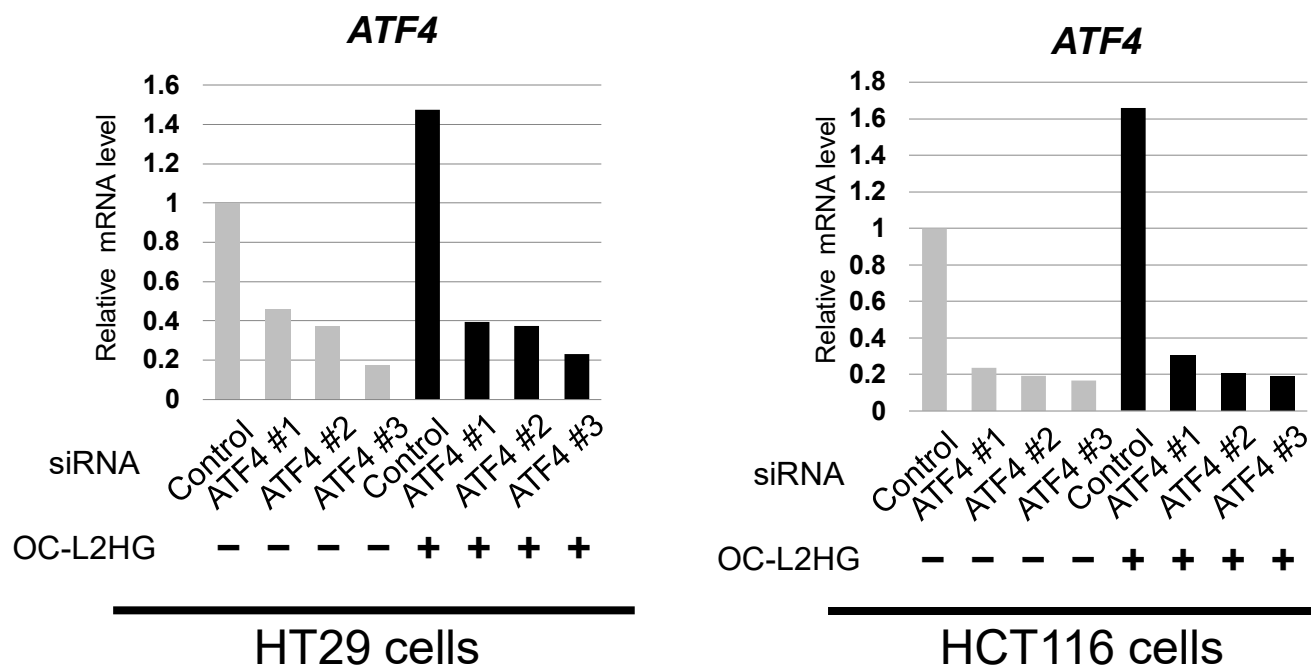

F

## HT29 cells

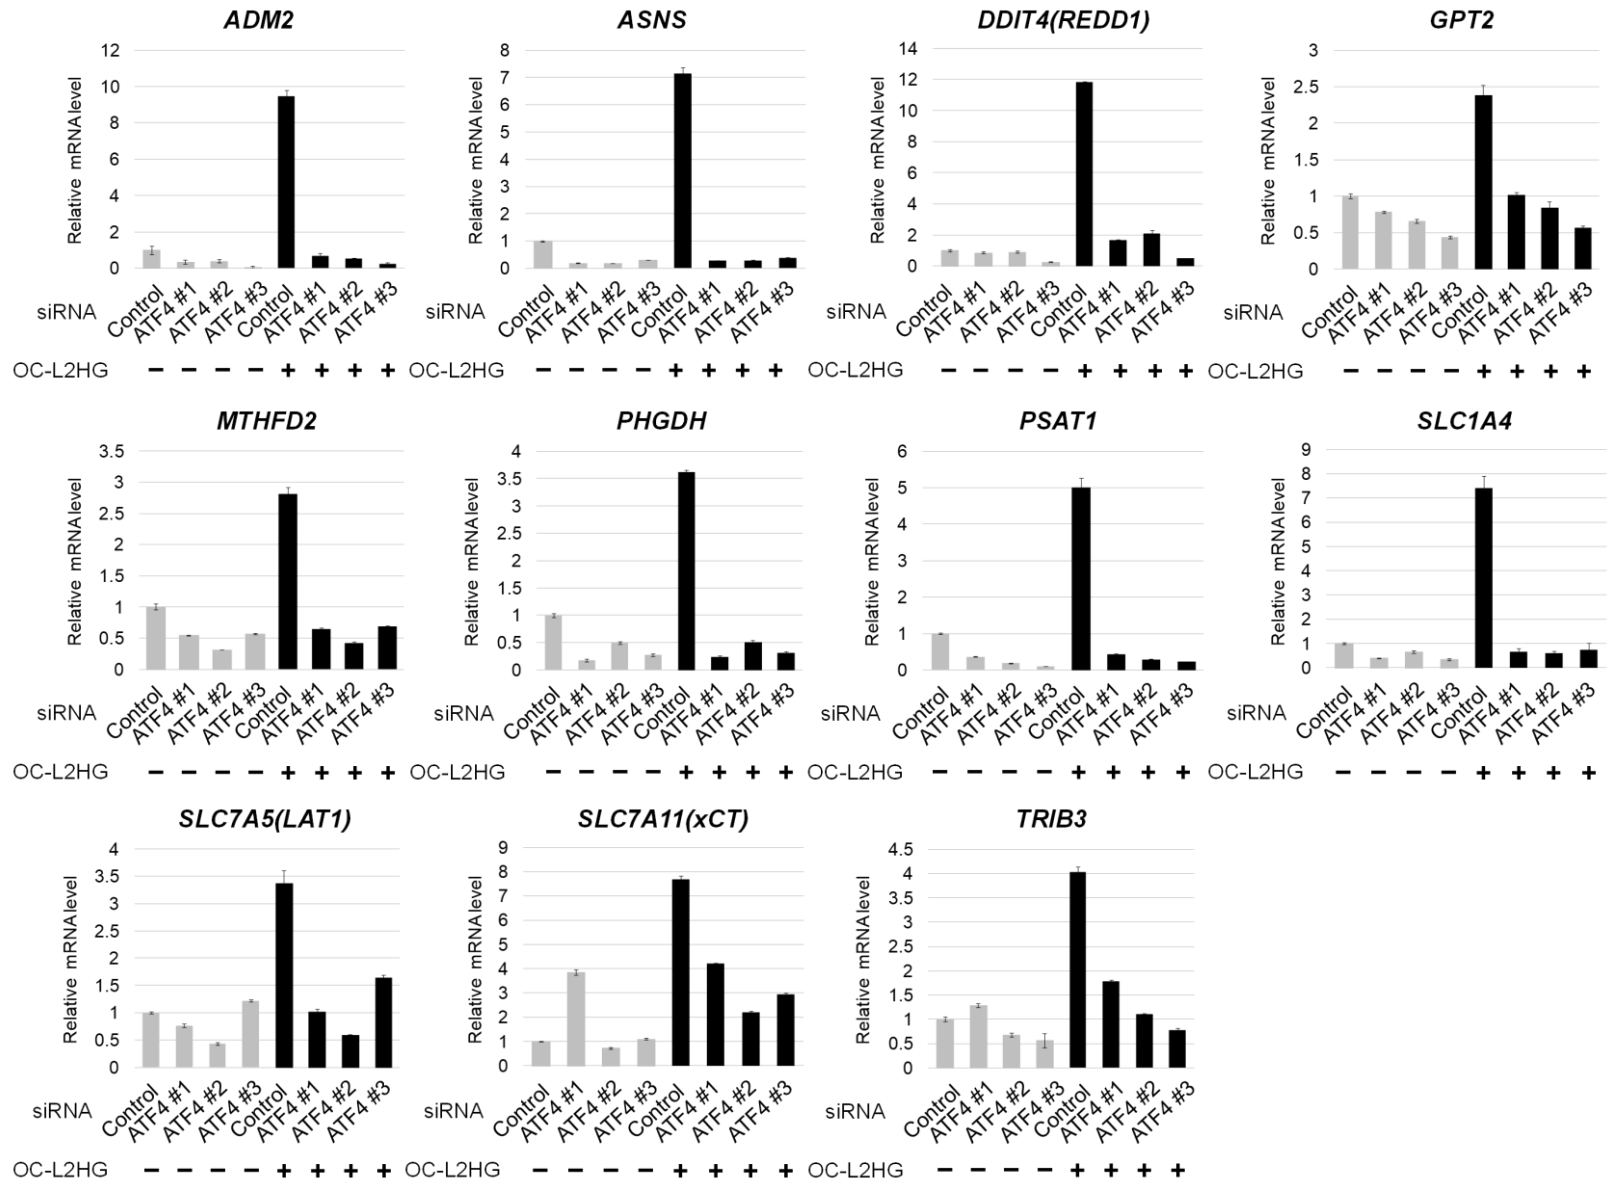

## HTCT116 cells

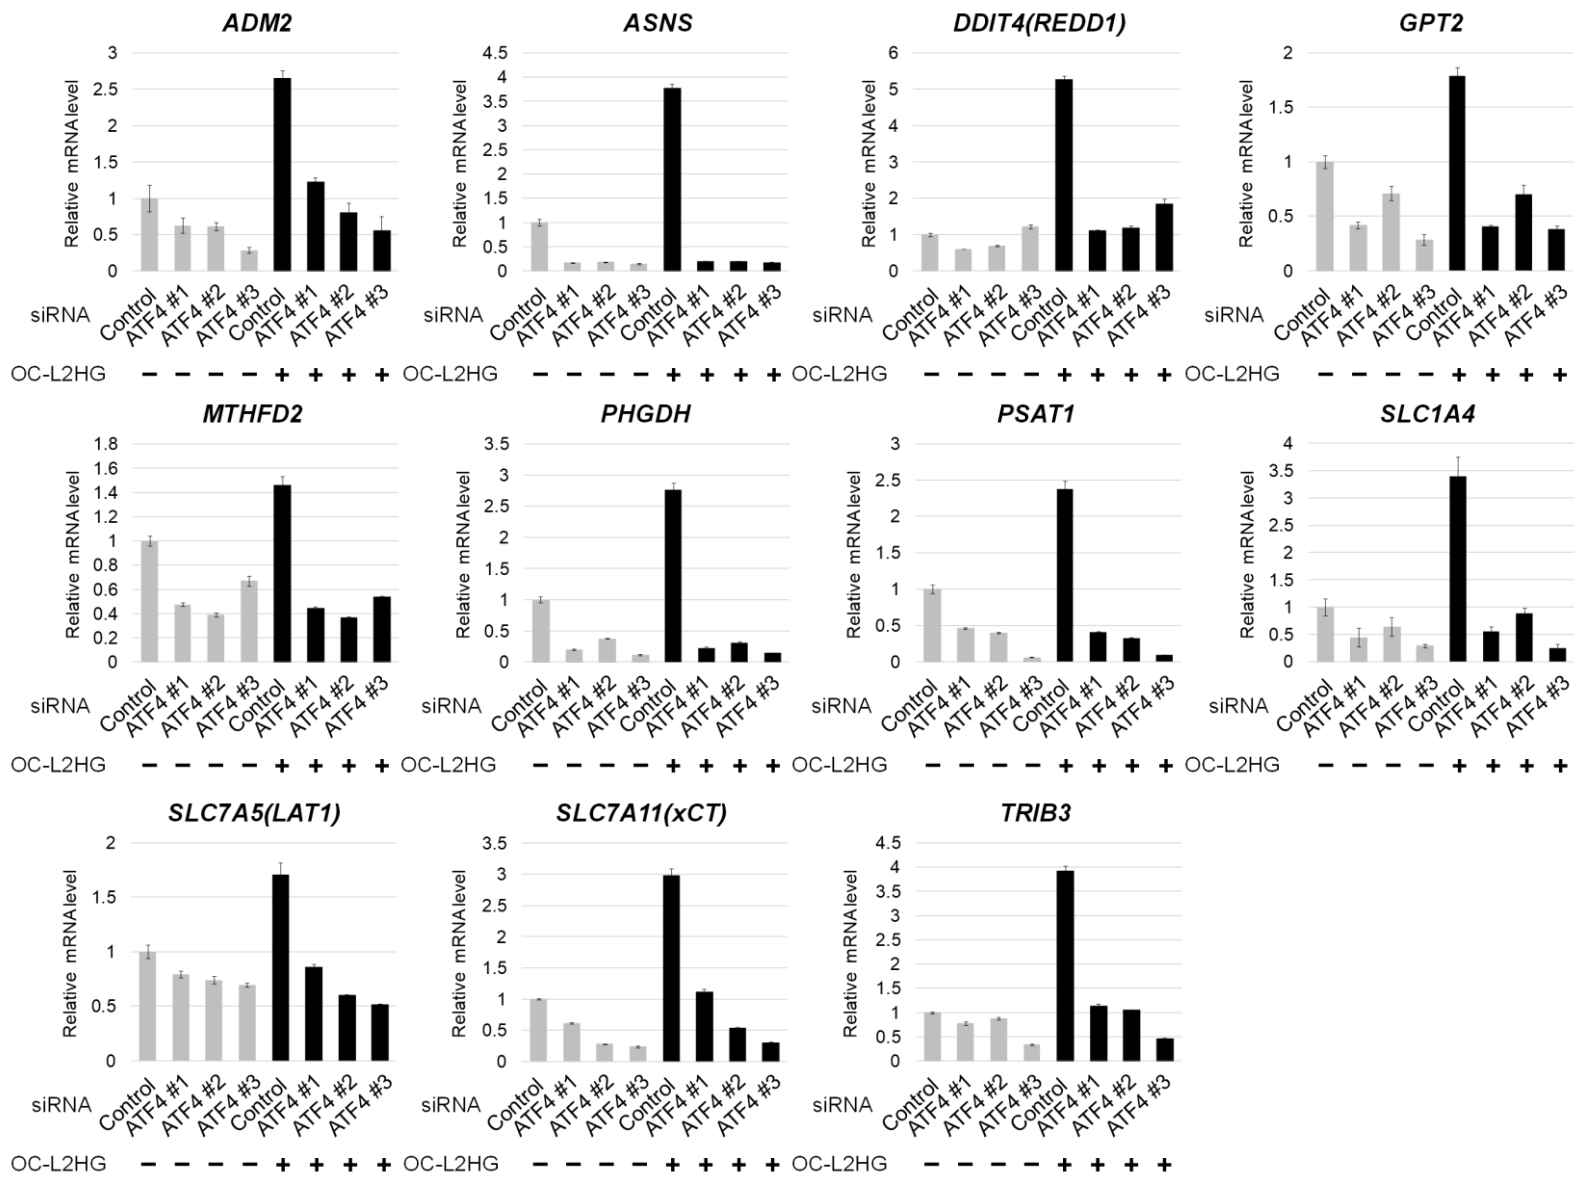

G

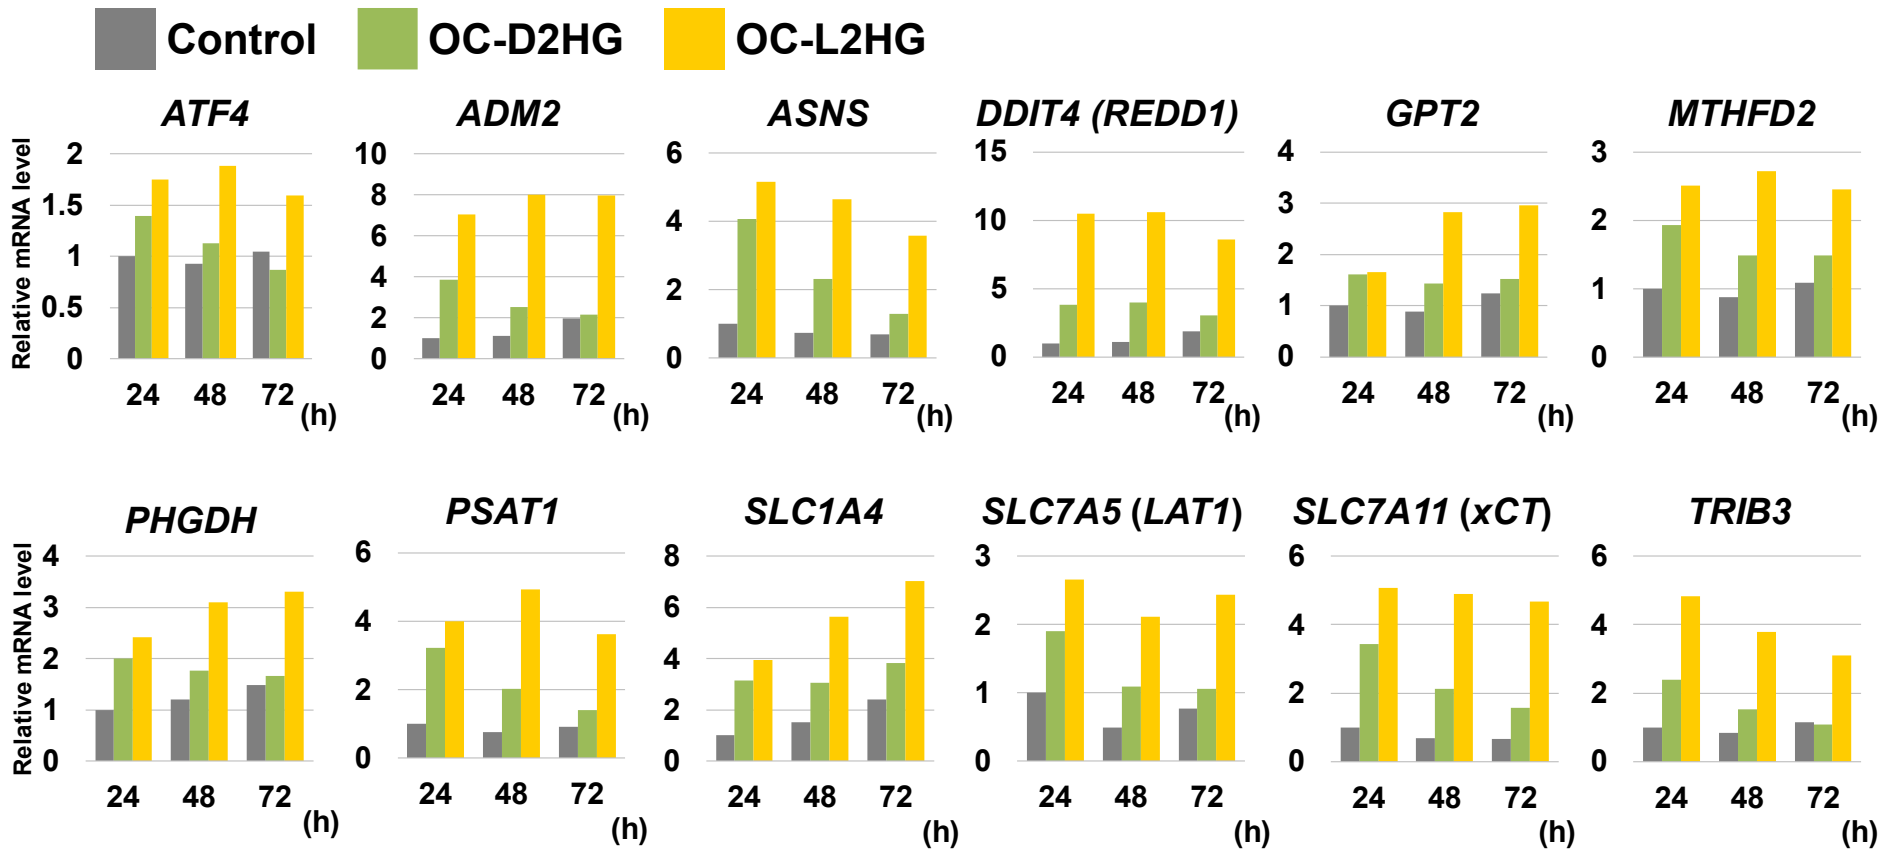

### Supplementary Fig. S2. L2HG induces ATF4 activation in CRC cells (related to Figure 2).

(A) mRNA expression of ATF4 and ATF4 target genes in HT29 cells treated with OC-L2HG for 24 h in a dose-dependent manner. (B) mRNA expression of ATF4 and ATF4 target genes in HT29 cells treated with 500  $\mu$ M OC-L2HG in a time-dependent manner. (C) mRNA expression of ATF4 and ATF4 target genes in HCT116 cells treated with OC-L2HG for 24 h in a dose-dependent manner. (D) mRNA expression of ATF4 and ATF4 target genes in CaR1 cells treated with 500  $\mu$ M OC-L2HG for 24 h. (E) siRNA knockdown of ATF4 in HT29 and HCT116 cells treated with and without 500  $\mu$ M OC-L2HG for 24 h. (F) Effect of ATF4 siRNA on ATF4 target genes in HT29 and HCT116 cells treated with and without 500  $\mu$ M OC-L2HG for 24 h. qPCR data are the average of 3 technical replicates and representative of at least 2 independent experiments with similar results. (G) Analysis of the mRNA expression of ATF4 target genes in HT29 cells stimulated with 500  $\mu$ M OC-L2HG or 500  $\mu$ M OC-D2HG for 24 h, using real-time PCR. Data represent the average of three technical replicates and are representative of at least two independent experiments with similar results.

## Supplementary Fig. S3

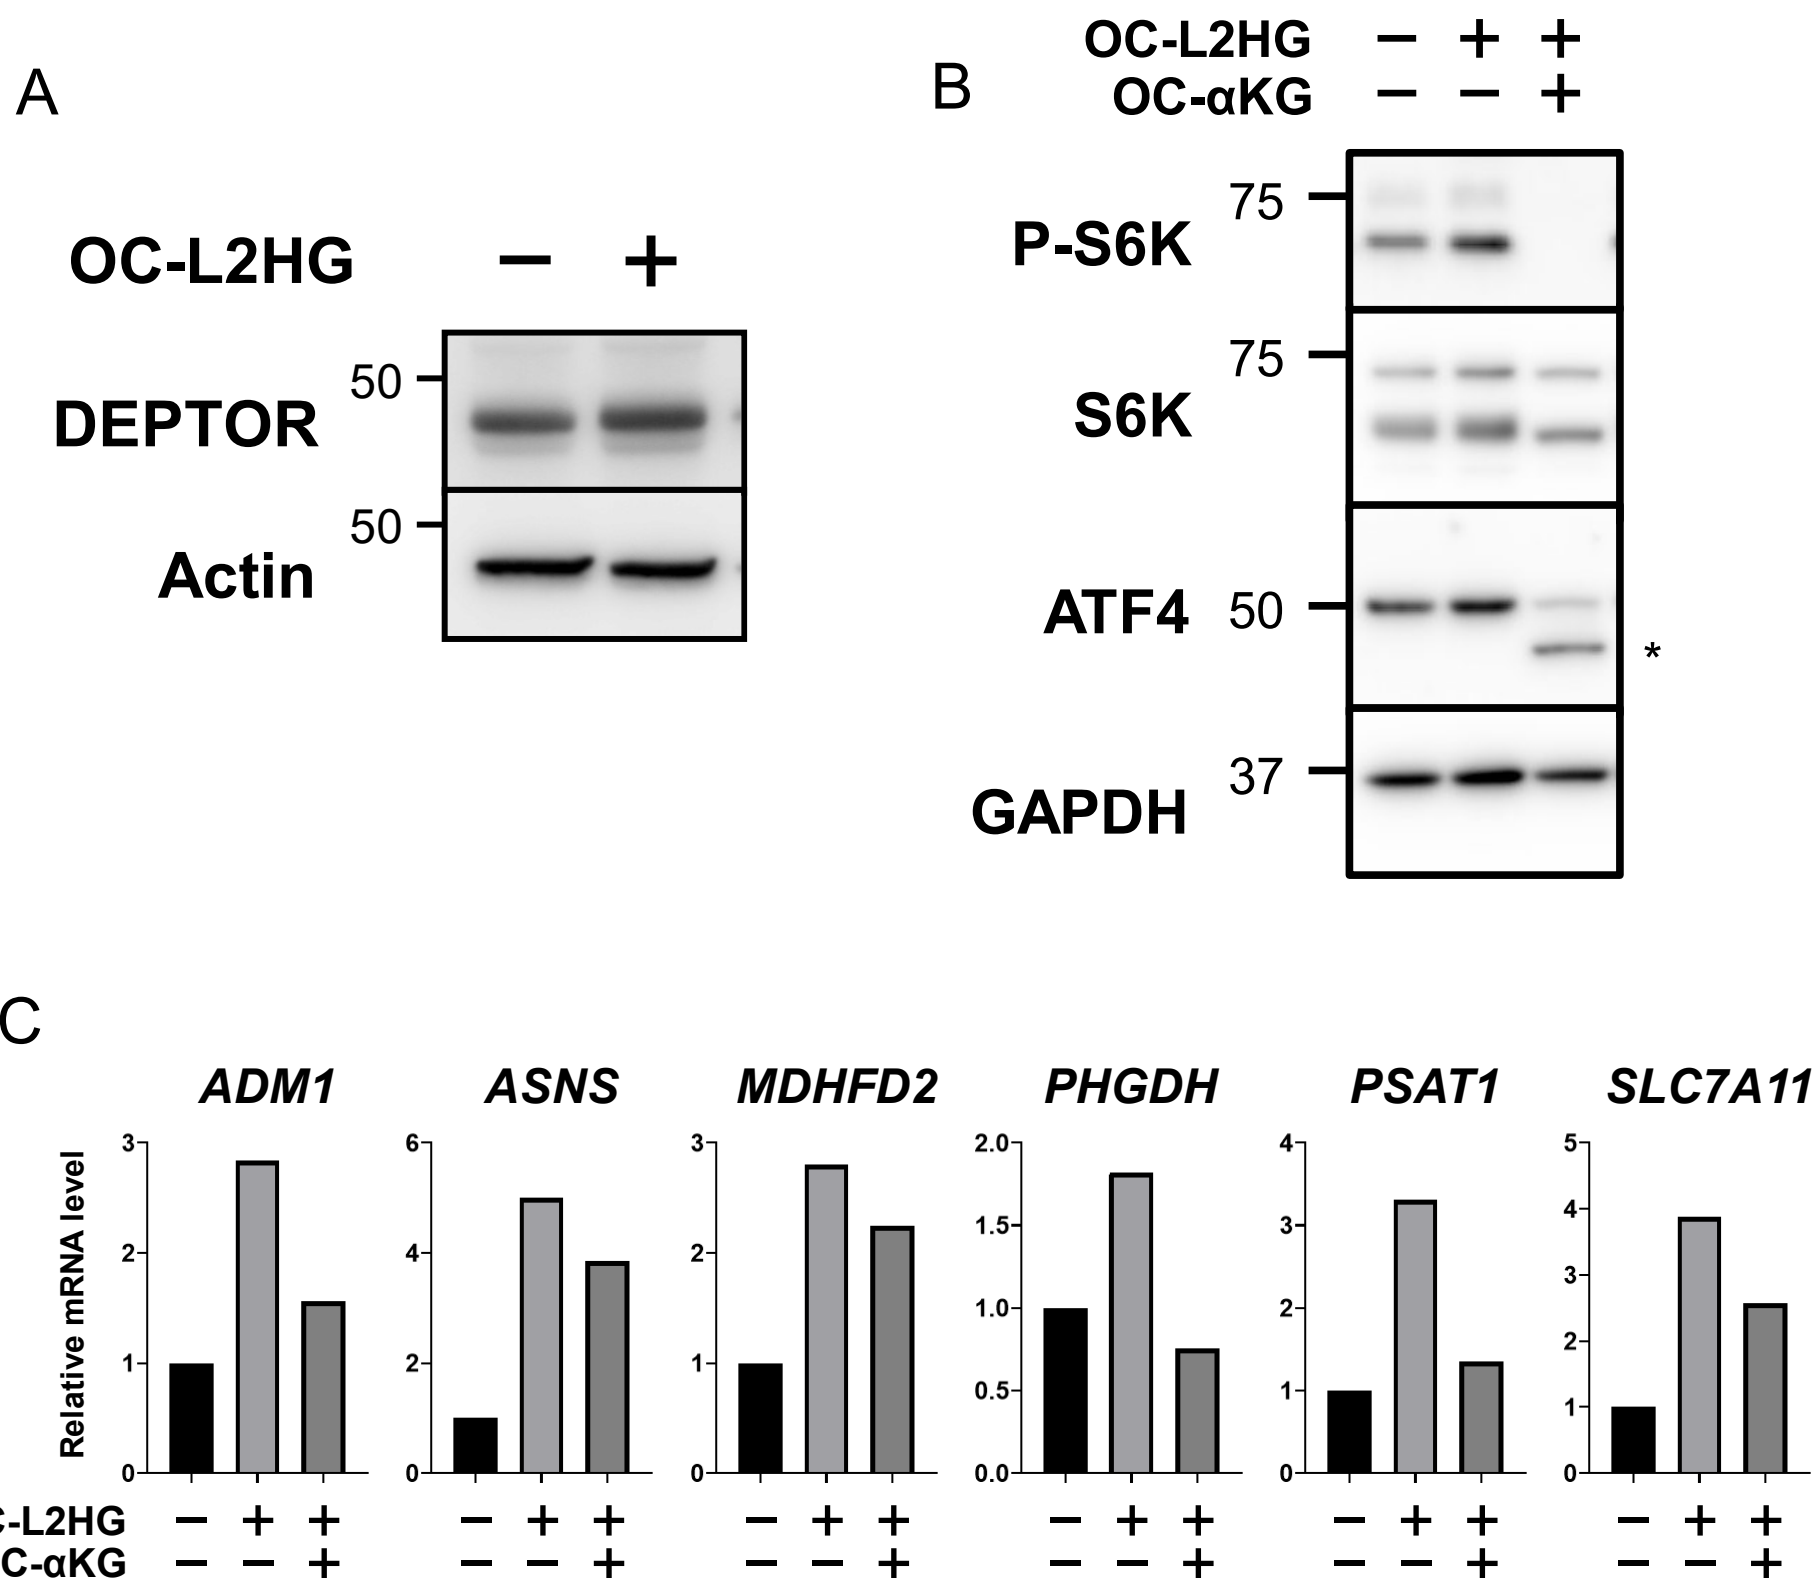

### Supplementary Fig. S3. L2HG increases ATF4 expression via mTOR signaling in CRC cells (related to Figure 3).

(A) Expression of DEPTOR in HT29 cells treated with 500  $\mu$ M OC-L2HG for 24 h under serum-free conditions. (B) Effect of OC- $\alpha$ KG (500  $\mu$ M) on P-S6K and ATF4 expression in HT29 cells treated with OC-L2HG for 9 h under serum-free conditions. Asterisk, nonspecific band. (C) Effect of OC- $\alpha$ KG on the expression of ATF4 target genes in HT29 cells treated with OC-L2HG for 9 h under serum-free conditions.

# Supplementary Fig. S4

## A

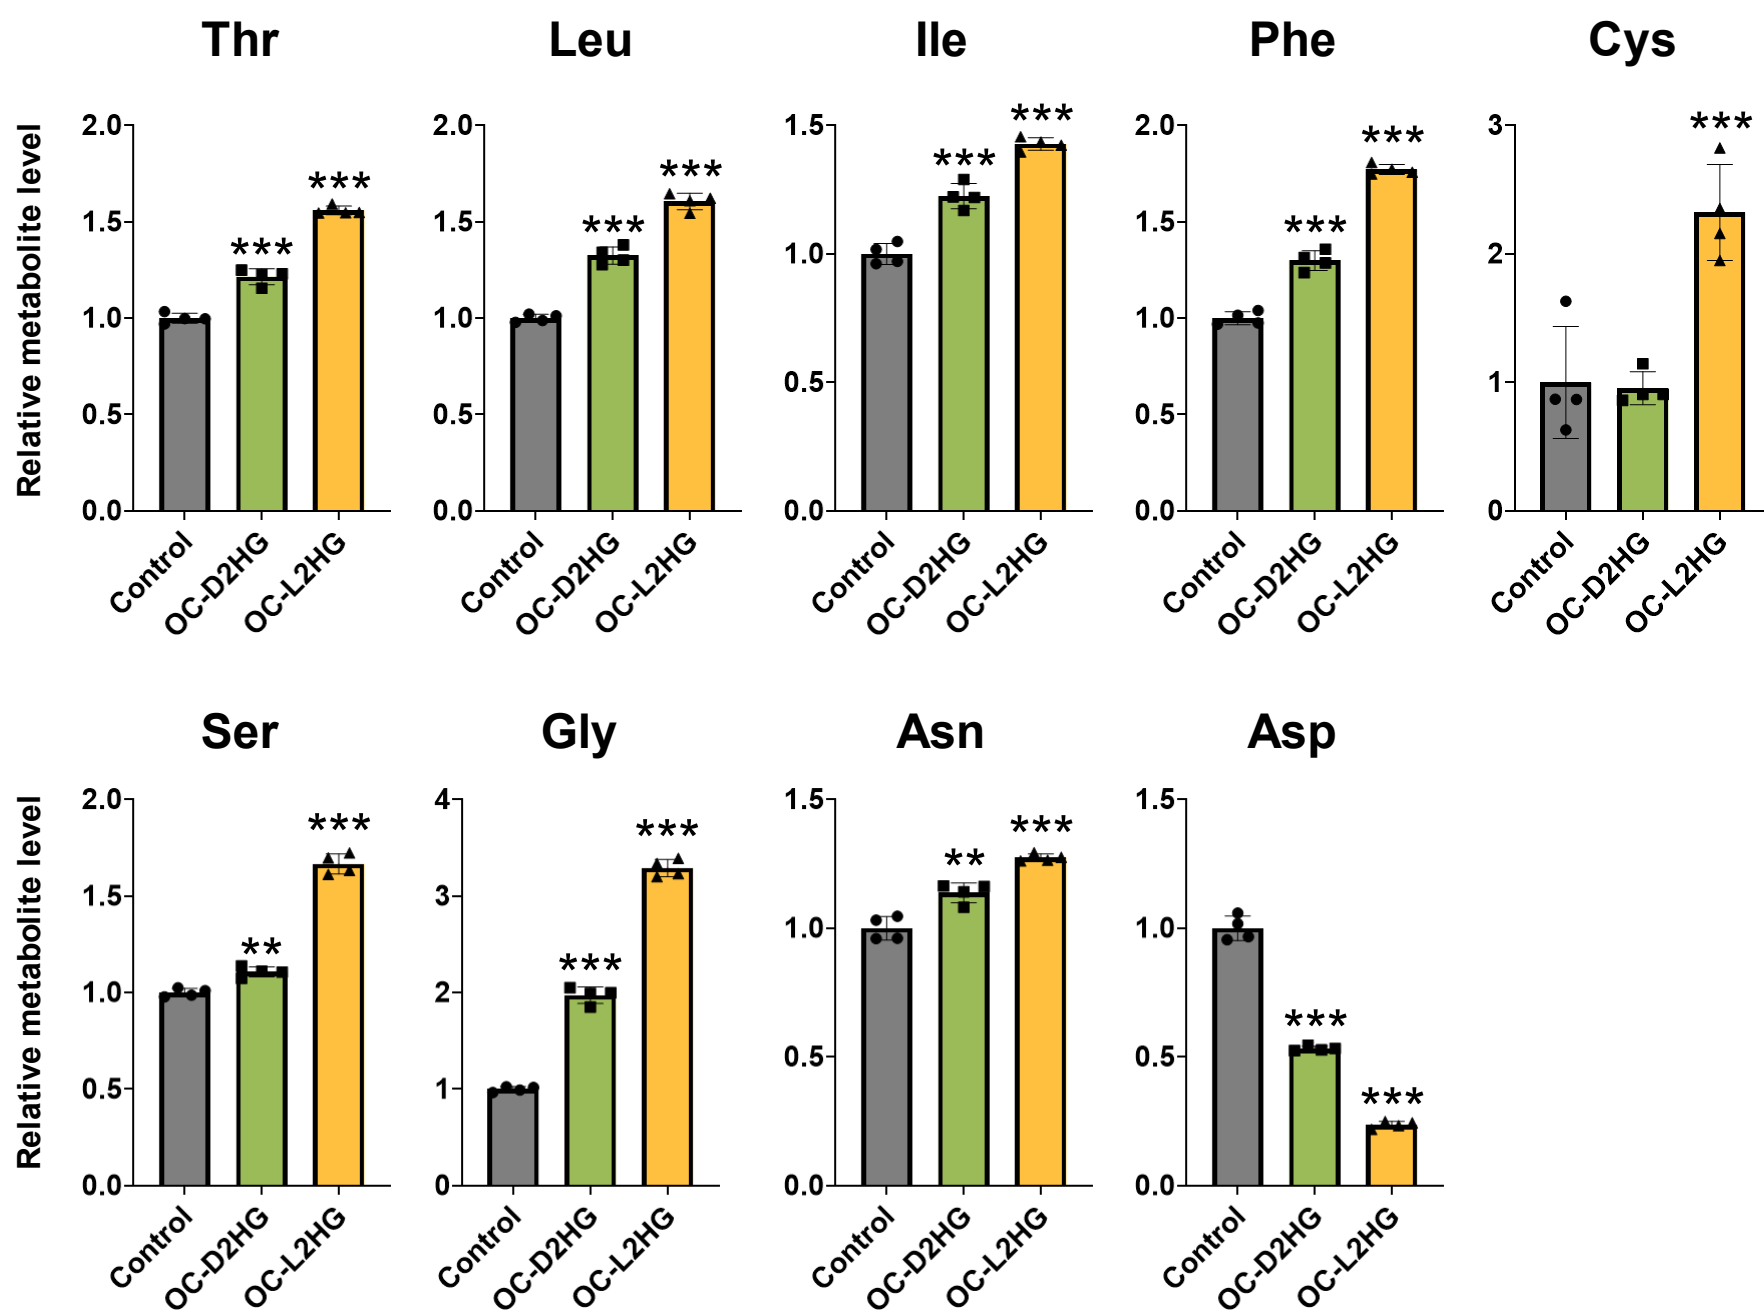

## B

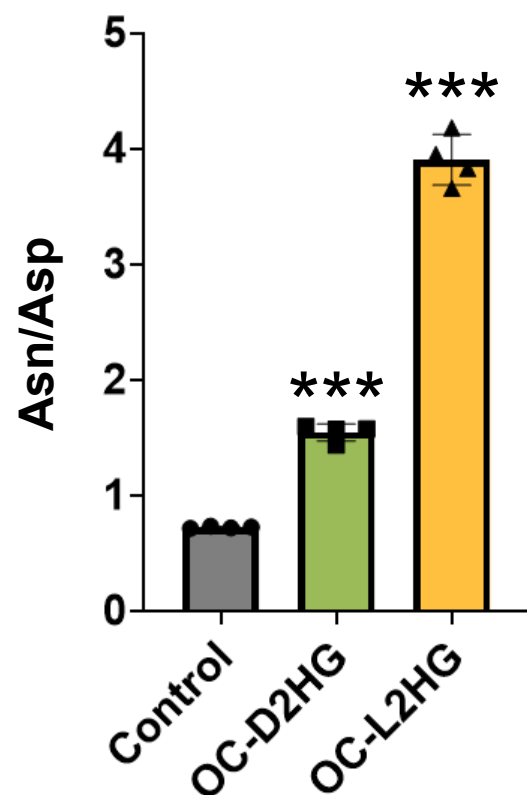

**Supplementary Fig. S4. L2HG mediates ATF4 induction to regulate amino acid metabolism in CRC cells (related to Figure 4).**

(A) Effect of OC-L2HG and OC-D2HG on the level of amino acids in HT29 cells. (B) Ratio of Asn to Asp in HT29 cells treated with OC-L2HG and OC-D2HG. Data are presented as the mean  $\pm$  SD of three independent experiments. \*\*  $P < 0.01$  and \*\*\*  $P < 0.001$ .



# Supplementary Fig. S5

**A**

HT29

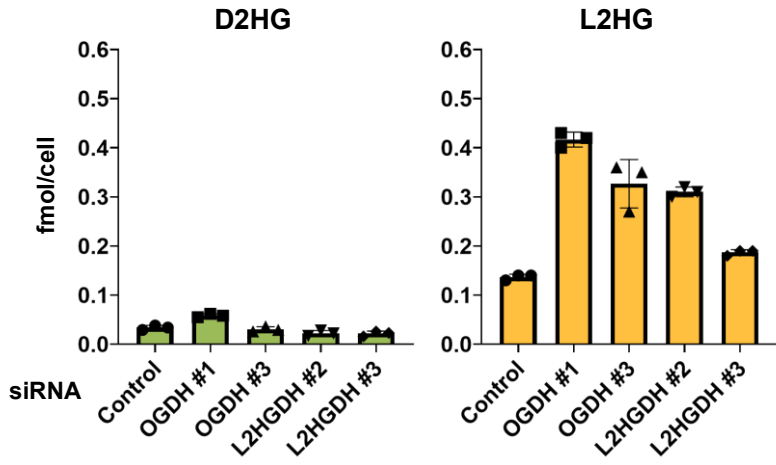

**B**

HCT116

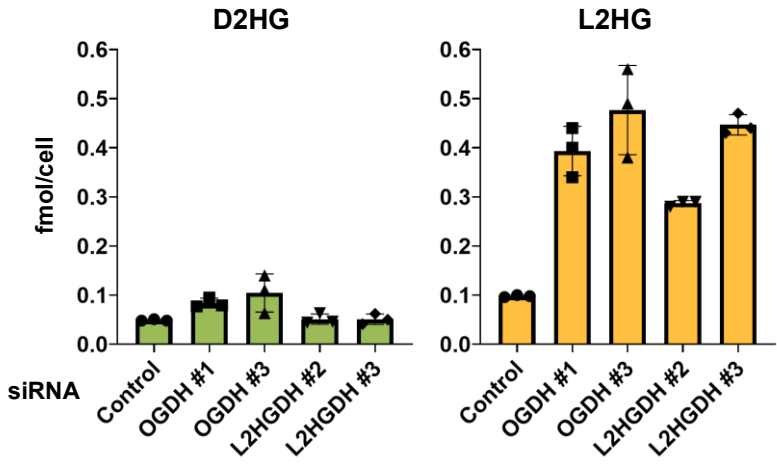

**C**

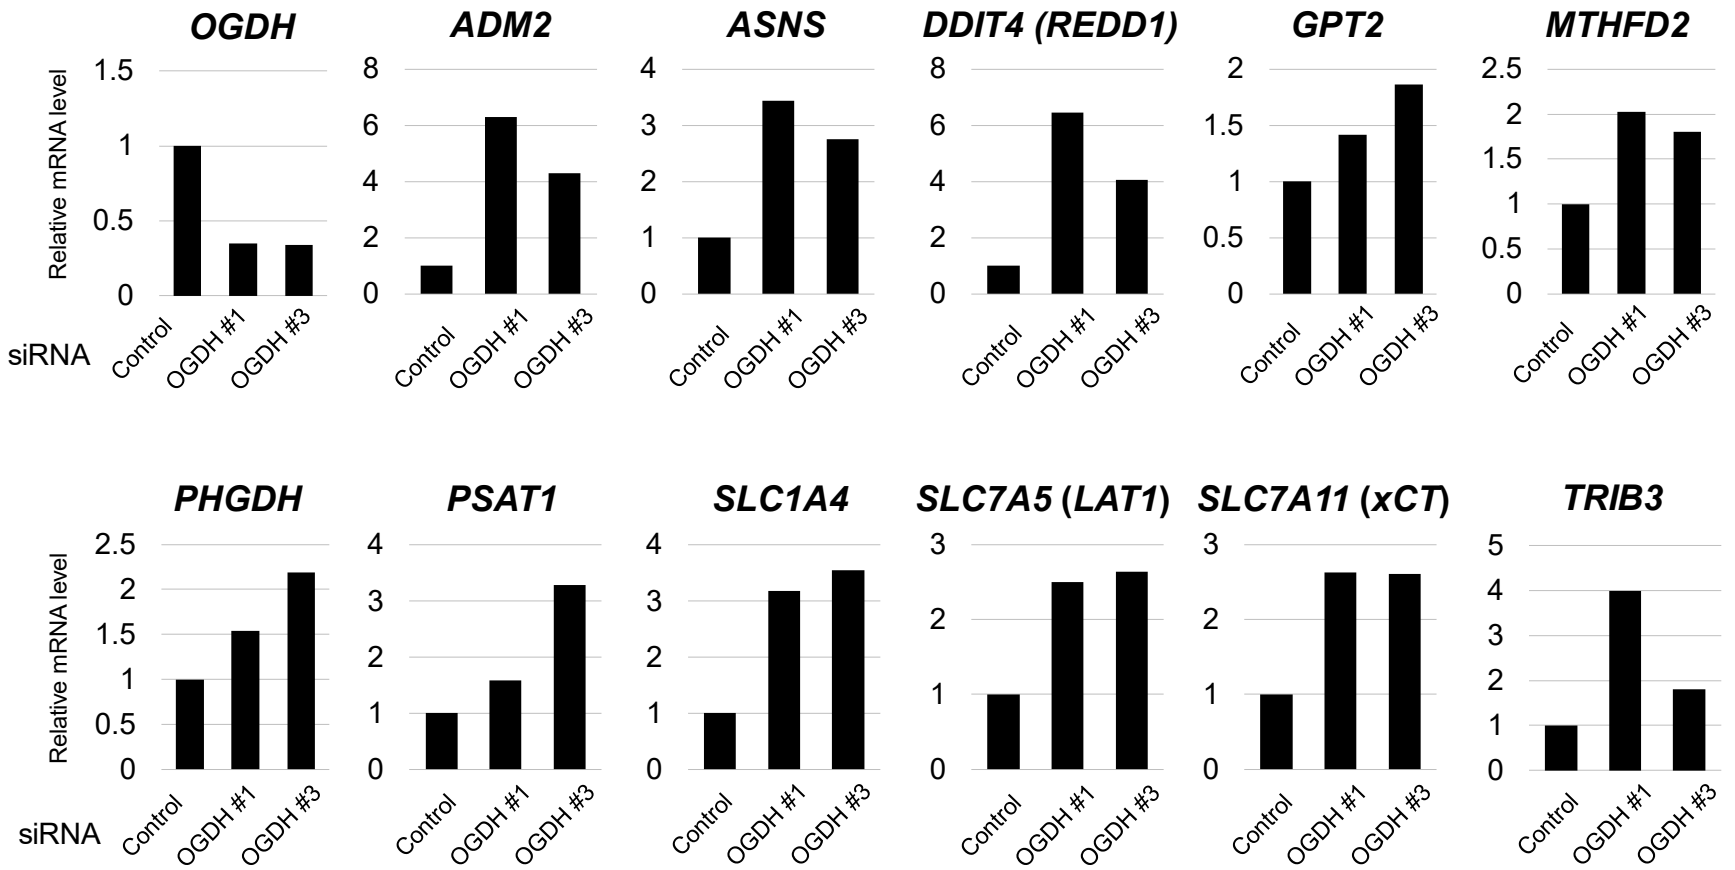

**D**

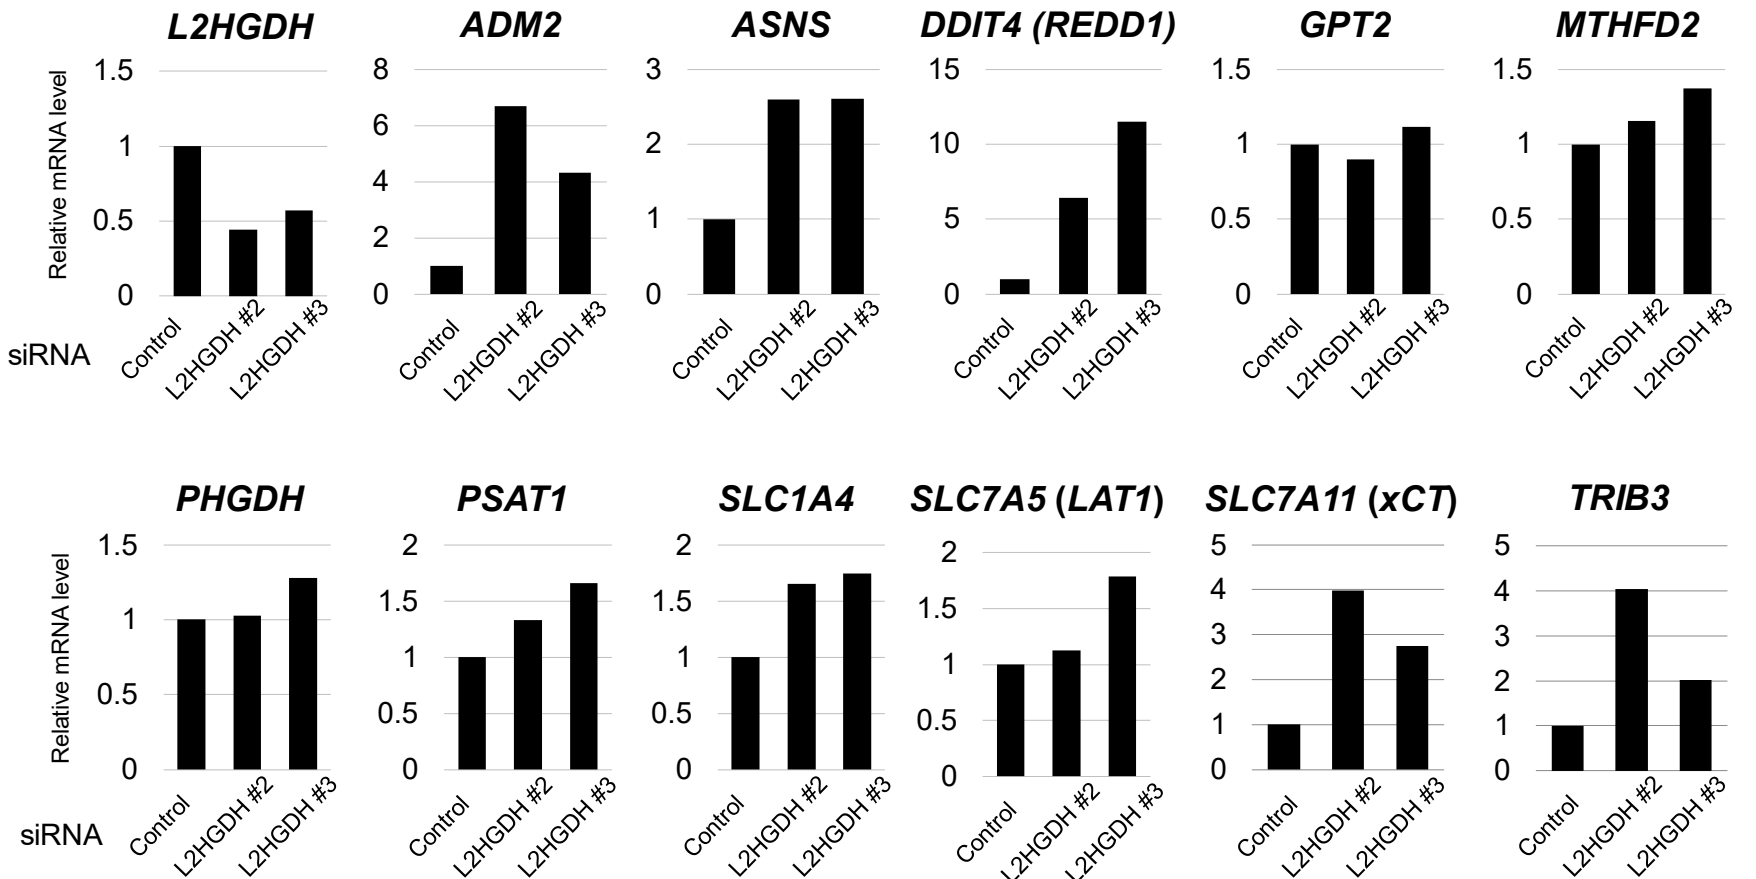

**Supplementary Fig. S5. L2HGDH and OGDH downregulation increase L2HG levels and induce ATF4 in CRC (related to Figure 5).**

(A and B) Levels of D/L2HG in HT29 cells (A) and HCT116 cells (B) transfected with OGDH and L2HGDH siRNA. Data are presented as the mean  $\pm$  SD of three independent experiments. (C) Effect of OGDH knockdown on mRNA expression of OGDH and ATF4 target genes in HT29 cells, using real-time PCR. qPCR data are the average of 3 technical replicates and representative of at least 2 independent experiments with similar results. (D) Effect of L2HGDH knockdown on mRNA expression of L2HGDH and ATF4 target genes in HT29 cells.

## Supplementary Fig. S6

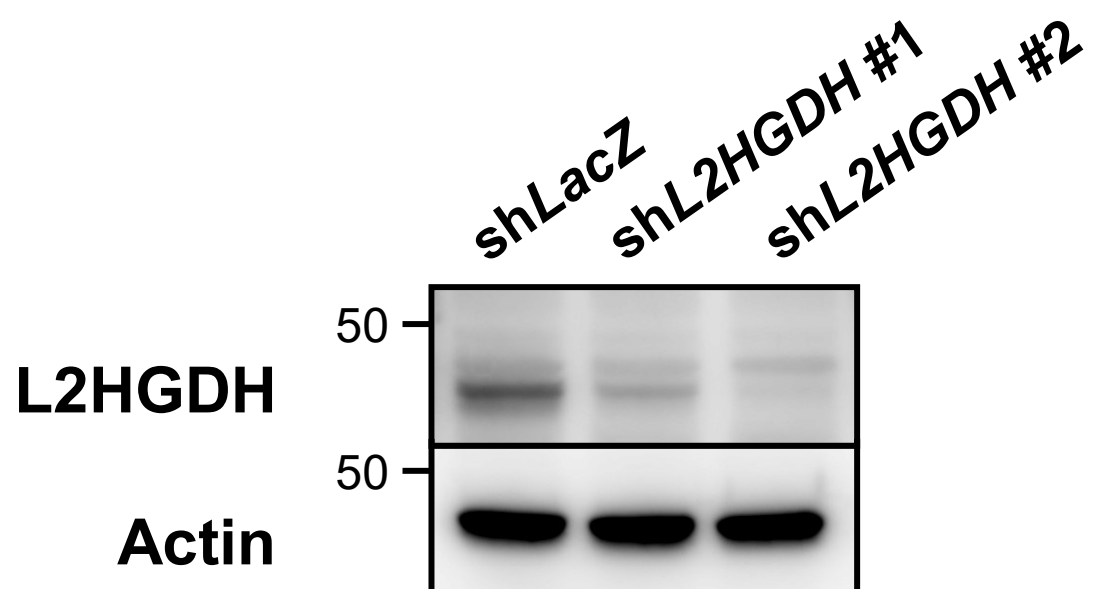

**Supplementary Fig. S6. L2HGDH knockdown increases tumor growth and alters amino acid metabolism *in vivo* (related to Figure 7).**  
shRNA-mediated knockdown of L2HGDH in HT29 cells.
